1 C-reactive protein and high-sensitivity C-reactive protein  
2 levels in asymptomatic intestinal parasite carriers from  
3 urban and rural areas of Gabon

4

5 CRP, hsCRP and intestinal parasites in Gabon

6

7 Helena Noéline Kono<sup>1,2,4</sup>, Mérédith Flore Ada Mengome<sup>1,2,4</sup>, Bedrich Pongui Ngondza<sup>1,2</sup>, Roger Hadry Sibi  
8 Matotou<sup>1,2</sup>, Luccheri Ndong Akomezoghe<sup>1,3</sup>, Bernadette Ekomi<sup>1</sup>, Bridy Chesly Moutombi Ditombi<sup>1,2,3</sup>, Jeanne  
9 Vanessa Lengongo Koumba<sup>1,2</sup>, Jacques Mari Ndong Ngomo<sup>1,2,3</sup>, Noé Patrick M'Bondoukwé<sup>1,2,3</sup>, Cyrille Bisseye<sup>4</sup>,  
10 Denise Patricia Mawili-Mboumba<sup>1,2,3</sup>, Marielle Karine Bouyou Akotet<sup>1,2,3\*</sup>

11

12 1. Department of Parasitology-Mycology- Tropical Medicine, Faculty of Medicine, University of Health  
13 Sciences, Owendo, Gabon

14 2. Centre de Recherche biomédicale En pathogènes Infectieux et Pathologies Associées (CREIPA),  
15 Libreville, Gabon

16 3. Unité Mixte de Recherche sur les Agents Infectieux et leur Pathologie (UMRAIP), University of Health  
17 Sciences, Owendo, Gabon

18 4. Doctoral School in Fundamental and Applied Sciences and Department of Biology, Laboratory of  
19 Molecular and Cellular Biology, University of Sciences and Technology of Masuku, Franceville, Gabon

20

21 \* Corresponding author

22 E-mail: mariellebouyou@gmail.com (MKBA)

## 23 **Abstract**

### 24 **Background**

25 Chronic carriage of intestinal parasitic infections (IPIs) can induce chronic inflammation and dysbiosis, which are  
26 risk factors for non-communicable diseases. The objective of this study was to determine the relationship between  
27 IPI carriage and inflammation in a population of volunteers living in Gabon.

28

### 29 **Methodology and Principal Findings**

30 A cross-sectional study was conducted from September 2020 to November 2021 in asymptomatic participants  
31 aged 18 years and over residing in different areas of Gabon: Libreville (urban area) and Koula-Moutou and Bitam  
32 (rural areas). The detection of IPIs was carried out using common techniques. Inflammation markers, C-reactive  
33 protein (CRP), and high-sensitivity C-reactive protein (hsCRP) were assayed. Overall, 518 participants were  
34 included, 64.5% (n = 334) of whom resided in urban area and 35.5% (n = 184) in rural areas. The median age was  
35 35 years [27; 46]. The prevalence of asymptomatic IPIs was 29.9% (n = 155), with a significantly higher frequency  
36 in rural areas than in urban area (adjusted OR 6.6 [CI 3.2-13.8],  $p < 0.01$ ). Protozoa were more frequent than soil-  
37 transmitted helminths (STHs) in both areas: 81.6% (n = 40) in urban area and 69.8% (n = 74) in rural areas. STHs  
38 were predominant in rural areas (48.1%) than in urban area (22.4%). High concentrations of hsCRP and CRP were  
39 significantly more frequent in inhabitants of rural areas (23.4% (n = 43) and 56.5% (n = 104), respectively ( $p <$   
40  $0.01$ ) than those of urban area (11.1% (n = 37) and 34.5% (n = 116), respectively;  $p < 0.01$ ). High levels were more  
41 frequent in parasitized individuals (for hsCRP, 22.6%, n = 35,  $p < 0.01$ , for CRP, 52.9%, n = 82;  $p < 0.01$ ); in  
42 particular among STH carriers (for hsCRP; 65.9%, n = 27,  $p < 0.01$ , for CRP: 36.6%, n = 15;  $p < 0.01$ ).

43

### 44 **Conclusions/Significance**

45 This first study showed that asymptomatic IPIs, especially STHs, are associated with higher CRP and hsCRP  
46 levels. Others biomarkers of inflammation must be analyzed to confirm the relationship between asymptomatic  
47 IPIs and chronic inflammation.

48

## 49 **Author summary**

50 Repeated or chronic parasitism can maintain local or systemic chronic inflammation, CRP and hsCRP are sensitive  
51 biomarkers of subclinical low-grade inflammation. This study assessed the serum levels of CRP and hsCRP in

52 adults with or without intestinal parasite (IPI) carriage according to residence area and parasite species. IPI chronic  
53 carriage, especially with pathogenic protozoa and/or STH, was associated with higher levels of CRP and hsCRP.  
54 These findings suggest that intestinal parasite carriage contributes to low grade systemic inflammation which is a  
55 driver of NCD. The role of chronic carriage of other enteropathogens on chronic inflammation status as well the  
56 relationship between IPI and dysbiosis should be further analyzed in endemic countries.

57

## 58 **Introduction**

59 Intestinal parasitic infections (IPIs) due to intestinal protozoa and helminths including soil-transmitted helminths  
60 (STHs) still constitute a public health problem in sub-Saharan Africa (SSA). The IPI burden is due to favorable  
61 climatic conditions, the absence or insufficient hygiene and sanitary measures, and poverty [1]. In endemic areas,  
62 IPIs are often more frequent in rural than in urban areas, and are generally asymptomatic and thus undiagnosed,  
63 leading to chronic parasite carriage [1].

64 Moreover, while diet and smoking are more frequently associated with the occurrence of non-communicable  
65 diseases (NCD) in high-income countries, with NCD-related mortality associated with older age groups, other  
66 factors such as younger age, could be a cause in low- and middle-income countries (LMIC) where NCD related  
67 deaths frequently occur in 30-69-year-old individuals [2]. Therefore, it is important to determine region-specific  
68 modifiable NCD risk factors. Apart from diet and smoking for example, environmental factors and infectious  
69 diseases, which are more common in LMIC, can contribute to the occurrence of NCD in endemic countries. Indeed,  
70 one of the main drivers of NCD is chronic inflammation. Cardiovascular diseases (CVD), type 2 diabetes, and  
71 metabolic syndrome are associated with persistent or chronic inflammation, even low-grade, by inducing or  
72 increasing insulin resistance and atherosclerosis [3, 4]. Infectious diseases, either bacterial, viral or parasitic, when  
73 repeated or chronic, generally maintain systemic chronic inflammation, which can increase the susceptibility to  
74 age-related inflammatory status and chronic immune system activation, both of which are recognized as cardio-  
75 metabolic diseases risk factors (CMDRF) [5-8]. Furthermore, alteration of the gut microbiota, which is correlated  
76 with cardio-metabolic diseases, can be caused by parasite-induced alteration of the microbial community during  
77 chronic infection [9, 10]. Indeed, intestinal protozoa such as *Blastocystis hominis* and *Giardia intestinalis* local  
78 inflammatory responses during chronic carriage have shown to be linked to dysbiosis [11, 12].

79 C-reactive protein (CRP) is a sensitive biomarker of subclinical, low-grade inflammation, its level increases during  
80 chronic disorders including metabolic ones in apparently healthy individuals [13]. High-sensitivity CRP (hsCRP)  
81 is a measurement of very low levels of plasma CRP, which provides an estimation of body inflammatory status,

82 notably low levels of inflammation. Both biomarkers are associated with an increased risk of atherosclerosis and  
83 are recognized as independent risk factors of CVD [14-17]. As an example, high hsCRP concentrations have been  
84 shown to be associated with the risk of CVD and to predict the occurrence of myocardial infraction in apparently  
85 healthy individuals [15].

86 In Gabon, a country of sub-Saharan Africa, high prevalences of IPIs are reported with high rates among  
87 asymptomatic young people and adults who also have numerous CMDRF [18-20]. Recent surveys highlighted a  
88 high frequency of pre-high blood pressure and hyperglycemia among apparently healthy adults from urban and  
89 semi-urban settings [20]. Interestingly, although these populations carry the usual CMDRF, they are the most  
90 frequent IPI carriers and anemics [21]. Identifying the possible relationship between chronic IPI carriage and  
91 systemic inflammation would allow identification of IPIs as possible risk factors for CMD in endemic settings.  
92 This would promote an integrated approach of NCD and CD control in co-endemic areas.

93 The present study assessed the level of CRP and hsCRP as biomarkers of systemic inflammation in uninfected and  
94 asymptomatic IPI carriers according to the type of parasitosis and the level of urbanization in Gabon.

95

## 96 **Methods**

### 97 **Ethical considerations**

98 The study protocol was authorized by the Ministry of Public Health of the Gabonese Republic and approved by  
99 the National Ethics Committee (under reference PROT N°002/2020/PR/SG/CNE). This was an observational  
100 study. The infected patients received appropriate antihelminthic or antiprotozoal treatment according to the  
101 national guidelines. Malaria, HIV and Hepatitis positive individuals were sent to the infectiology unit for  
102 appropriate case management and follow-up.

103

### 104 **Study sites and populations**

105 Volunteer participants were enrolled from September 2020 to November 2021 in different settlements of Gabon:  
106 Libreville (urban area) and Koula-Moutou and Bitam (both considered to be rural areas). Libreville is the capital  
107 of Gabon, with approximately 703,939 inhabitants and comprising almost half of the country's population  
108 (Direction Générale de la Statistique 2015). Koula-Moutou, the main city of the province of Ogooué-lolo (south-  
109 eastern Gabon), is located 588 km from Libreville, with an estimated population of 25,651 inhabitants. Bitam, the

110 main city of Ntem is located in the north of Gabon, in the province of Woleu-ntem, and comprises approximately  
111 27,923 inhabitants.

112 The recruitment was performed by the teams of Centre de Recherche en pathogènes Infectieux et Pathologies  
113 Associées (CREIPA) in Melen, at the Centre Hospitalier Régional Paul Moukambi of Koula-Moutou (CHRPM)  
114 and at the medical center of Bifolossi at Bitam.

115 Participants were included according to the following criteria: being aged 18 years or older, having resided for at  
116 least two years in the study area, absence of any clinical symptoms in the last six months, and providing signed  
117 informed consent. No volunteers with a serious health problem or with a history of stroke, cardiovascular diseases  
118 (CDV), known chronic infection such as HIV, viral hepatitis infections, tuberculosis, or who had taken an  
119 antiparasitic treatment in the last six months were included.

120

## 121 **Procedures**

122 The volunteers underwent malaria, HIV, and hepatitis testing by microscopy-based testing. Those who tested  
123 positive were not included in the analysis.

124 The demographic and socioeconomic data of the participants were recorded on a standardized case report form.

125 Approximately five mL of blood samples were collected by venipuncture for C-reactive protein (CRP), high-  
126 sensitivity C-reactive protein (hsCRP) measurements.

127 For the testing of intestinal parasite infections, sterile clean containers were distributed to each participant with  
128 clear instructions for stool collection. Stools may be collected in the morning and immediately returned to the  
129 study team. However, some participants who did not provide the samples in the morning were allowed to deliver  
130 their stool samples to the study team later in the same day.

131

## 132 **Laboratory analysis**

133 **Inflammatory biomarkers measurement: C-reactive protein (CRP) and high-**  
134 **sensitivity C-reactive protein (hsCRP)**

135 CRP and hsCRP levels were determined using a GETEIN C1100 point of care test (Getein Biotech, INC., Nanjing,  
136 Popular Republic of China), which is based on measurement by indirect immunofluorescence using two  
137 antibodies: an anti-human CRP monoclonal antibody coupled to the fluorescence latex located at the sample area

138 and an anti-human CRP monoclonal antibody attached to the test line. The measurements were performed  
139 according to the manufacturer's instructions. The serum CRP concentration was considered to be elevated when  
140 the level was higher than or equal to 10 mg/L and for hsCRP for levels higher than 3 mg/L.

141

## 142 **Diagnosis of intestinal parasitic infections**

143 IPIs were diagnosed by direct microscopic examination and merthiolate-iodine-formaldehyde (MIF) staining  
144 which allowed identification of helminth eggs and the cystic and vegetative forms of protozoa as described  
145 elsewhere [22]. The Kato-katz technique allowed detection and quantification of STHs and *Schistosoma* spp. on a  
146 thick slide equivalent to 41.7 mg of stool (number of eggs/g of feces). Coproculture was used for the identification  
147 of *Necator americanus* (hookworm) and *Strongyloides stercoralis* larvae. Samples were considered positive when  
148 at least one cyst, one egg, or one larva was detected.

149

## 150 **Statistical analysis**

151 The data were analyzed using SPSS 20.0 software (IBM, New York, USA). The qualitative data are presented as  
152 percentages and the quantitative data were checked for the normal distribution before applying the appropriate  
153 location indicators: mean  $\pm$  standard deviation for series that have a normal distribution and median and  
154 interquartile range (IQR) otherwise. The corrected Chi-square statistical test and Fischer's exact test were used for  
155 the comparisons between the demographic and socioeconomic characteristics in each area.

156 Univariate logistic regression was performed to assess the unadjusted association between demographic,  
157 socioeconomic characteristics and the presence of IPIs; and between the presence of inflammation and age and the  
158 area of residence and the presence and types of IPIs. Multivariate logistic regression was used to determine the  
159 independent predictors of IPIs, high CRP and high hsCRP levels; models were adjusted for sociodemographic  
160 characteristics, area of residence and IPI for biomarkers levels. The multivariate model was theory-based; thus, all  
161 predictor variables were included in the multivariate model irrespective of their statistical significance in the  
162 bivariate analysis. Adjusted odds ratio (aOR) and crude odds ratio (cOR) were reported at a 95% confidence  
163 interval (CI). All  $p$  - values are two-tailed, and  $p \leq 0.05$  was considered statistically significant.

164

## 165 **Definitions**

- 166
- Normal CRP level was below 10 mg/L, for hsCRP it was less than or equal to 3 mg/L.

- 167 • Coinfection: presence of at least two different types of parasites (helminth and protozoan).
- 168 • Unemployed: participants with no income and no gainful activities.

169

## 170 **Results**

### 171 **Demographic and socioeconomic characteristics of the study**

#### 172 **population**

173 A total of 518 participants were included, 64.5% (n = 334) in urban area and 35.5% (n = 184) in rural areas.

174 Women predominated in rural areas (59.8%, n = 110) as well as in the urban area (67.4%, n = 225).

175 The median age was 35 [27 - 46] years overall, with the inhabitants from rural areas being older than those from  
176 the urban area (42 [33 - 50] years vs. 32.0 [26 - 44] years  $p < 0.01$ ). Overall, almost half (48.5%, n = 251) of the  
177 participants were aged between 30 and 49 years old; the older ones predominated in rural area population relative  
178 to the urban area (29.3%, n = 54 vs 12.3%, n = 41, respectively;  $p < 0.01$ ).

179 Two-thirds of them (68.0%, n = 352) had attended high school or secondary school, mostly from the urban area,  
180 while 19.9% (n = 103) from the rural areas did not have a professional activity. However, those with a primary  
181 education level predominated in the rural areas compared to the urban area (50.5%, n = 93 vs. 16.2%, n = 54,  
182 respectively), and a high school level predominated in the urban area relative to the rural areas (40.4%, n = 135  
183 vs. 4.3%, n = 8, respectively;  $p < 0.01$ ). Likewise, students predominated in the urban area population compared  
184 to the rural areas (36.8%, n = 123 vs. 3.8%, n = 7, respectively;  $p < 0.01$ ), and the unemployment predominated in  
185 the rural area population (27.2%, n = 50 vs. 15.9%, n = 53, in the urban areas;  $p < 0.01$ ).

186

### 187 **Prevalence of IPIs and relationship with sociodemographic**

#### 188 **characteristics**

189 The overall prevalence of asymptomatic IPI was of 29.9% (n = 155). The bivariate analysis showed that IPIs were  
190 significantly more frequent in the rural areas, in participants older than 29 years of age, those with primary or  
191 secondary school attendances, and the unemployed (Table 1). After, the multivariate analysis, only living in a rural  
192 area was found to be a risk factor for IPIs (Table 1).

193

194 **Table 1. Demographic and socioeconomic characteristics of the population overall and according to the**  
 195 **presence of IPIs**

|                   |             | Global | IPIs       |                |         |                |         |
|-------------------|-------------|--------|------------|----------------|---------|----------------|---------|
|                   |             | N      | N (%)      | cOR (95%CI)    | p-value | aOR (95%CI)    | p-value |
| Area              | Urban       | 334    | 49 (14.7)  | Reference      | -       | Reference      | -       |
|                   | Rural       | 184    | 106 (57.6) | 8.0 (5.2-12.0) | < 0.01  | 6.6 (3.2-13.8) | < 0.01  |
| Gender            | Female      | 335    | 93 (27.8)  | Reference      | -       | Reference      | -       |
|                   | Male        | 183    | 62 (33.9)  | 1.3 (0.9-2.0)  | 0.15    | 1.3 (0.8-2.0)  | 0.32    |
| Age (years)       | 18-29       | 172    | 31 (18.0)  | Reference      | -       | Reference      | -       |
|                   | 30-49       | 251    | 86 (34.3)  | 2.4 (1.5-3.8)  | < 0.01  | 1.7 (0.9-3.4)  | 0.10    |
|                   | ≥ 50        | 95     | 38 (40.0)  | 3.0 (1.7-5.3)  | < 0.01  | 1.5 (0.8-3.3)  | 0.32    |
| School attendance | High school | 143    | 21 (14.7)  | Reference      | -       | Reference      | -       |
|                   | Secondary   | 209    | 62 (29.7)  | 2.5 (1.4-4.4)  | < 0.01  | 1.2 (0.6-2.3)  | 0.60    |
|                   | Primary     | 147    | 66 (44.9)  | 3.7 (1.9-6.9)  | < 0.01  | 1.5 (0.7-3.3)  | 0.29    |
|                   | None        | 19     | 6 (31.6)   | 2.7 (0.9-7.8)  | 0.07    | 0.9 (0.2-3.4)  | 0.88    |
| Occupation        | Students    | 130    | 21 (16.2)  | Reference      | -       | Reference      | -       |
|                   | Workers     | 285    | 93 (32.6)  | 2.5 (1.5-4.3)  | < 0.01  | 0.7 (0.3-1.6)  | 0.38    |
|                   | Unworkers   | 103    | 41 (39.8)  | 3.4 (1.9-6.3)  | < 0.01  | 0.7 (0.3-1.8)  | 0.47    |

196 Table 1 shows the comparison of IPI carrier frequencies by area of residence, gender, age, school attendance and  
 197 occupation. Comparison was made between IPI carriers for all characteristics to determine the associated risk  
 198 factors by two- and multi-variable logistic regression tests. All groups with the lowest prevalence of IPIs were  
 199 selected as a reference. OR: odds ratio.  
 200

201 Protozoa (n = 114) were more common than helminths (n = 62) in the participants overall (Fig 1). Helminths–  
 202 protozoa coinfection was found in 13.5% (n = 21) of the infected participants and was more frequent in rural areas  
 203 than in the urban area (17.9%, n = 19 vs. 4.1%; n = 2, respectively). Likewise, while the helminth prevalence was  
 204 high in rural areas, protozoa were more prevalent in the urban site (Fig 1).

205 Common protozoan parasites were *Entamoeba coli* (n = 77), *Blastocystis* sp (n = 45), and *Entamoeba*  
 206 *histolytica/dispar* (n = 20). Common STH included *Trichuris trichiura* (n = 33) and *Ascaris lumbricoides* (n = 18)  
 207 (Fig 1).  
 208

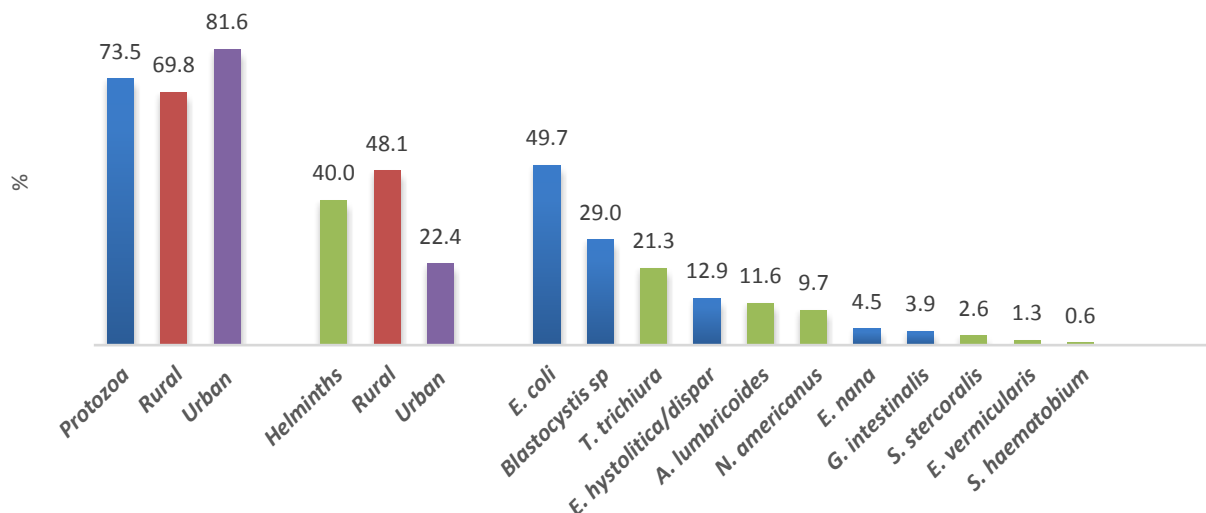

209



210 **Fig 1. Distribution of intestinal parasite species in the study population.** The blue bars of the histogram  
 211 correspond to the frequency of the protozoa, the green bars to those of the helminths.

212

## 213 CRP and hsCRP levels according to the presence or absence of IPI

214 Overall, the median concentration of hsCRP was of 2.8 [1.4 - 5.2] mg/L and that of CRP was 15.1 [11.5 - 25.0]  
 215 mg/L. The prevalence of a high hsCRP concentration was 42.5% (n = 220) and that of a high CRP concentration  
 216 was 15.4% (n = 80). Bivariate analysis showed that a high hsCRP concentration occurred more frequently in  
 217 inhabitants of rural areas, in older individuals, and in those with IPI. Elevated CRP concentrations predominated  
 218 in rural inhabitants and in those who were parasitized (Table 2). After adjusting for sociodemographic factors,  
 219 gender, and sites, only living in a rural area was found to be significantly associated with high hsCRP (aOR 2.0  
 220 [CI 1.3-3.1],  $p < 0.01$ ).

221 STH carriers were at higher risk of having high hsCRP (aOR 3.1 [CI 1.6 - 6.2],  $p < 0.01$ ) and high CRP (aOR 4.1  
 222 [CI 2.0-8.3],  $p < 0.01$ ) levels (Table 2). A trend toward an association between protozoan carriage and high hsCRP  
 223 (aOR 1.5 [CI 0.3-2.3],  $p = 0.10$ ) and high CRP levels was also observed (Table 2).

224 All carriers of *Giardia intestinalis* and *Strongyloides stercoralis* had elevated hsCRP levels. However, bivariate  
 225 analyses indicated that the presence of *Entamoeba histolytica/dispar* and *Giardia intestinalis* were significantly  
 226 associated with a higher frequency of a high hsCRP concentration compared to the absence of IPI. Participants  
 227 infected by *Trichuris trichiura* and hookworm had significantly higher hsCRP concentrations (Table 2). Likewise,  
 228 *Trichuris trichiura* and *Necator americanus* carriages were associated with a high CRP concentrations (Table 2).

229

230 **Table 2. Prevalence of elevated hsCRP and CRP levels according to the sociodemographic characteristics**  
 231 **of the population and the results of intestinal parasitosis testing**

|                     |           | Elevated hsCRP<br>( $> 3$ mg/L) |               |            | Elevated CRP<br>( $\geq 10$ mg/L) |               |            |
|---------------------|-----------|---------------------------------|---------------|------------|-----------------------------------|---------------|------------|
|                     |           | N (%)                           | cOR 95% CI    | $p$ -value | N (%)                             | cOR 95% CI    | $p$ -value |
| Area                | Urban     | 116 (34.7)                      | Reference     | -          | 37 (11.1)                         | Reference     | -          |
|                     | Rural     | 104 (56.5)                      | 2.4 (1.7-3.5) | $< 0.01$   | 43 (23.4)                         | 2.4 (1.8-3.9) | $< 0.01$   |
| Gender              | Female    | 135 (40.3)                      | Reference     | -          | 49 (14.6)                         | Reference     | -          |
|                     | Male      | 85 (46.4)                       | 1.3 (0.9-1.9) | 0.18       | 31 (16.9)                         | 1.2 (0.7-1.9) | 0.49       |
| Age (years)         | 18 - 29   | 58 (33.7)                       | Reference     | -          | 21 (12.2)                         | Reference     | -          |
|                     | 30 - 49   | 113 (45.0)                      | 1.6 (1.1-2.4) | 0.02       | 41 (16.3)                         | 1.4 (0.8-2.5) | 0.24       |
|                     | $\geq 50$ | 49 (51.6)                       | 2.1 (1.3-3.5) | 0.01       | 18 (18.9)                         | 1.7 (0.8-3.3) | 0.14       |
| IPIs                | Absent    | 138 (38.0)                      | Reference     | -          | 45 (12.4)                         | Reference     | -          |
|                     | Present   | 82 (52.9)                       | 1.8 (1.3-2.7) | $< 0.01$   | 35 (22.6)                         | 2.1 (1.3-3.4) | $< 0.01$   |
| Type of parasitosis | Protozoa  | 44 (47.3)                       | 1.5 (0.9-2.3) | 0.10       | 17 (18.3)                         | 1.6 (0.9-2.9) | 0.14       |
|                     | STHs      | 27 (65.9)                       | 3.1 (1.6-6.2) | 0.01       | 15 (36.6)                         | 4.1 (2.0-8.3) | $< 0.01$   |

|                          |                              |           |                  |        |           |                 |        |
|--------------------------|------------------------------|-----------|------------------|--------|-----------|-----------------|--------|
|                          | <b>Co-infection</b>          | 11 (52.4) | 1.8 (0.7-4.3)    | 0.19   | 3 (14.3)  | 1.2 (0.3-4.2)   | 0.80   |
| <b>Number of species</b> | <b>1 protozoan</b>           | 31 (45.6) | 13.4 (0.8-2.3)   | 0.24   | 14 (20.6) | 1.8 (0.9-3.6)   | 0.08   |
|                          | <b>2 protozoa</b>            | 9 (47.4)  | 1.5 (0.6-3.7)    | 0.42   | 3 (15.8)  | 1.3 (0.4-4.7)   | 0.67   |
|                          | <b>3 protozoa</b>            | 3 (60.0)  | 2.4 (0.4-14.8)   | 0.33   | 0 (0.0)   | 0.6 (0.03-11.7) | 0.76   |
|                          | <b>4 protozoa</b>            | 1 (100.0) | 4.9 (0.2-120.7)  | 0.33   | 0 (0.0)   | 2.3 (0.1-58.1)  | 0.61   |
|                          | <b>1 STH</b>                 | 23 (65.7) | 3.1 (1.5-6.5)    | < 0.01 | 14 (40.0) | 4.7 (2.2-9.9)   | < 0.01 |
|                          | <b>2 STHs</b>                | 4 (66.7)  | 3.3 (0.6-18.0)   | 0.18   | 1 (16.7)  | 1.4 (0.2-12.4)  | 0.76   |
|                          | <b>2 STH/protozoa</b>        | 6 (66.7)  | 3.3 (0.8-13.3)   | 0.10   | 0 (0.0)   | 0.4 (0.02-6.4)  | 0.49   |
|                          | <b>3 STH/protozoa</b>        | 2 (22.2)  | 0.5 (0.1-2.3)    | 0.35   | 1 (11.1)  | 0.9 (0.1-7.2)   | 0.91   |
| <b>Protozoan species</b> | <i>Blastocystis sp</i>       | 21 (46.7) | 1.4 (0.8-2.7)    | 0.26   | 8 (17.8)  | 1.5 (0.7-3.5)   | 0.31   |
|                          | <i>E. coli</i>               | 34 (43.6) | 1.3 (0.8-2.1)    | 0.36   | 11 (14.1) | 1.2 (0.6-2.4)   | 0.68   |
|                          | <i>E. histolytica/dispar</i> | 13 (65.0) | 3.0 (1.2-7.8)    | 0.02   | 5 (25.0)  | 2.4 (0.8-6.8)   | 0.10   |
|                          | <i>E. nana</i>               | 4 (57.1)  | 1.2 (0.5-9.9)    | 0.31   | 1 (14.3)  | 1.2 (0.3-10.0)  | 0.88   |
|                          | <i>G. intestinalis</i>       | 6 (100.0) | 21.2 (1.2-378.7) | 0.04   | 1 (16.7)  | 1.4 (0.2-12.4)  | 0.76   |
| <b>Helminth species</b>  | <i>T. trichiura</i>          | 20 (60.6) | 2.5 (1.2-5.2)    | 0.01   | 11 (33.3) | 3.5 (1.6-7.8)   | < 0.01 |
|                          | <i>A. lumbricoides</i>       | 9 (52.9)  | 1.8 (0.7-4.9)    | 0.22   | 3 (17.6)  | 1.5 (0.4-5.5)   | 0.53   |
|                          | <i>E. vermicularis</i>       | 0 (0.0)   | 0.3 (0.02-6.8)   | 0.47   | 0 (0.0)   | 1.4 (0.1-29.6)  | 0.83   |
|                          | <i>N. americanus</i>         | 10 (66.7) | 3.3 (1.1-9.7)    | 0.03   | 5 (33.3)  | 3.5 (1.2-10.8)  | 0.03   |
|                          | <i>S. stercoralis</i>        | 4 (100.0) | 14.7 (0.8-274.3) | 0.07   | 1 (25.0)  | 2.4 (0.2-23.1)  | 0.46   |

232 This table shows the frequency of elevated CRP and hsCRP concentrations as a function of the areas of residence,  
233 the sex, the age, the presence of IPI and according to the different species of parasites. On the other hand, the ORs  
234 were calculated by bivariate analysis. STH: soil – transmitted helminth, *E. coli*: *Entamoeba coli*, *E.*  
235 *histolytica/dispar*: *Entamoeba histolytica/dispar*, *E. nana*: *Endolimax nana*, *G. intestinalis*: *Giardia intestinalis*,  
236 *T. trichiura*: *Trichuris trichiura*, *A. lumbricoides*: *Ascaris lumbricoides*, *E. vermicularis*: *Enterobius vermicularis*,  
237 *N. americanus*: *Necator americanus*, *S. stercoralis*: *Strongyloides stercoralis*  
238

## 239 Association between CRP, hsCRP and sociodemographic 240 characteristics in parasitized participants

241 Male participants tended to be at higher risk of having high hsCRP levels when infected compared to women  
242 (Table 3). Living in remote areas was associated with an increased level of CRP. Age did not increase the risk of  
243 inflammation in parasitized individuals (Table 3).

245 **Table 3. Bivariate and Multivariate analysis of factors associated with high inflammatory biomarkers among the IPI - infected participants**

|               |        | Elevated hsCRP |               |                  |               |                  | Elevated CRP |               |                  |               |                  |
|---------------|--------|----------------|---------------|------------------|---------------|------------------|--------------|---------------|------------------|---------------|------------------|
|               |        | N (%)          | cOR 95% CI    | <i>p</i> - value | aOR 95% CI    | <i>p</i> - value | N (%)        | cOR 95% CI    | <i>p</i> - value | aOR 95% CI    | <i>p</i> - value |
| <b>Area</b>   | Urban  | 22 (44.9)      | Reference     | -                | Reference     | -                | 6 (12.2)     | Reference     | -                | Reference     | -                |
|               | Rural  | 60 (56.6)      | 1.6 (0.8-3.2) | 0.18             | 0.7 (0.3-1.4) | 0.28             | 29 (27.4)    | 2.7 (1.0-7.0) | 0.04             | 2.4 (0.9-6.5) | 0.08             |
| <b>Gender</b> | Female | 44 (47.3)      | Reference     | -                | Reference     | -                | 16 (17.2)    | Reference     | -                | Reference     | -                |
|               | Male   | 38 (61.3)      | 1.8 (0.9-3.4) | 0.09             | 1.7 (0.9-3.4) | 0.10             | 19 (30.6)    | 2.1 (1.0-4.6) | 1.94             | 2.0 (0.9-4.4) | 0.07             |
| <b>Age</b>    | 18-29  | 16 (51.6)      | Reference     | -                | Reference     | -                | 5 (16.1)     | Reference     | -                | Reference     | -                |
|               | 30-49  | 43 (50.0)      | 0.9 (0.4-2.1) | 0.88             | 1.2 (0.5-2.8) | 0.68             | 19 (22.1)    | 1.5 (0.5-4.4) | 0.48             | 1.3 (0.4-3.8) | 0.70             |
|               | ≥ 50   | 23 (60.5)      | 1.4 (0.5-3.7) | 0.46             | 0.8 (0.3-2.4) | 0.73             | 11 (28.9)    | 2.1 (0.6-7.0) | 0.22             | 1.5 (0.4-5.3) | 0.50             |

246

## 247 **Discussion**

248 The present study documented the CRP and hsCRP levels in apparently healthy residents from urban and rural  
249 areas of Gabon according to the carriage of intestinal parasites.

250 The overall prevalence of asymptomatic IPIs found in these populations (29.9%) was lower than in previous reports  
251 in other urban and rural areas of Gabon [18, 19]. The higher risk of IPIs, mainly STHs in rural sites, is not  
252 surprising. STHs are known to be prevalent in areas where certain existing conditions such as poverty, low level  
253 of hygiene and sanitation, and limited access to safe drinking water, favor their spread. The predominance of  
254 protozoa compared to STHs in the urban city of Libreville can also be explained by the frequent self-medication  
255 with antihelmintics that are freely sold to clients in pharmacies.

256 Similar to other LMIC, Gabon currently faces the double burden of infectious diseases (ID) and non-communicable  
257 diseases (NCD). Indeed, the burden of malaria, HIV, multi-resistant tuberculosis, and other parasite diseases  
258 remains high, while increases in NCD morbidity and cardiovascular mortality have also been reported [20, 23].  
259 Compared to high-income countries, high DALYs due to NCD attributed to ID have been reported in LMIC [24].  
260 Thus, while the current westernized lifestyle of inhabitants of SSA urban cities and capitals can partly explain the  
261 increase of NCD, this is not the case in rural and remote settlements, where populations live under different  
262 conditions with traditional lifestyles.

263 This study is one of the first to analyze a possible relationship between systemic inflammation, which is a  
264 recognized risk factor for CVD, and the presence of IPIs in Central Africa. Our hypothesis that chronic intestinal  
265 parasitism can induce a chronic inflammation was tested by measurement of CRP and hsCRP levels, which are  
266 biomarkers and indicators of low-grade inflammation in chronic infection [25]. CRP and hsCRP serum levels are  
267 independently and significantly associated with the risk of developing ischemic cardiovascular diseases [14].  
268 Moreover, high hsCRP was shown to be associated with the risk of CD and to predict the occurrence of myocardial  
269 infarction in healthy individuals [15].

270 A clear association was found between IPI carriage and biomarkers of systemic inflammation. Consistent with  
271 data reported elsewhere, the age of the participants was no found to be a significant risk factor for systemic  
272 inflammation [26]. The trends observed in the bivariate analysis is probably due to the predominance of  
273 participants who were more than 45 years of age in the rural sites, which are also those in which the highest levels  
274 of IPIs were recorded. The significant marked elevation of CRP and hsCRP in these areas, compared to the urban  
275 area, can be partly explained by the higher exposure and frequency of STH. These parasites induce mechanical  
276 and chemical damage, mucosal inflammation, and host immune responses, which are leading causes of long-term

277 inflammation, thereby representing potential drivers of NCD such as heart, lung, renal, and gastrointestinal  
278 diseases as well as cancers [7, 27]. Accordingly, the present results, which highlight an association between chronic  
279 pathogenic protozoa and/or STH carriage and increased levels of systemic inflammation biomarkers, suggest that  
280 IPIs also contribute to the development of NCD. For instance, some hookworms cause chronic iron-deficiency  
281 anemia; and iron deficiency has been reported to be associated with an increase in hsCRP or other inflammatory  
282 markers among healthy adults [28, 29]. Through egg migration-induced inflammation, egg embolization, and  
283 granuloma development, *Schistosoma* species are causes of cancer, induce renal diseases or pulmonary  
284 hypertension which can cause right ventricular failure [30]. Heavy trichuriasis causes chronic infiltration of  
285 inflammatory cells in the colon of infected children as well as iron-deficiency anemia [31]. Consistent with this,  
286 *Schistosoma* spp., hookworm, and *Trichuris trichiura*, chronic carriage was found associated with increased levels  
287 of CRP and hsCRP and thus certainly with low-grade chronic inflammation.

288 Strongyloidiasis appears to attenuate the systemic inflammation during coinfection or comorbidities [32]. In the  
289 present study, asymptomatic *Strongyloides stercoralis* carriers had a high hsCRP levels; further investigations in  
290 this regard should be performed.

291 The absence of an influence of the level of urbanization on the prevalence of participants with high levels of  
292 inflammation biomarkers in case of protozoan infection could be explained by the fact that more than 70% of the  
293 participants from all the study sites were chronically infected. An association, albeit weak, between the presence  
294 of the known pathogens *Entamoeba histolytica* and *Giardia intestinalis* and elevated hsCRP level was found.  
295 These pathogenic species, as well *Blastocystis* spp., can cause inflammation [11]. Globally, enteropathogens  
296 reduce iron absorption and increase systemic inflammation [8, 33]. The trend toward a higher risk of high  
297 biomarker levels in case of helminth-protozoa coinfection confirms the additional impact of protozoa on systemic  
298 inflammation.

299 This study has some limitations. First, although participants were asymptomatic and free of previous antiparasitic  
300 treatment, a recent instead of chronic IPI could not be formally excluded. However, the present results already  
301 highlight the clear association between the presence of such parasitism and high inflammation biomarker levels.  
302 Secondly, the detection of other enteropathogens such as bacteria and fungi, either as invasive pathogens of just  
303 colonized ones, was not performed. The analysis of the gut microbiota of the study participants is ongoing. Third,  
304 the absence of molecular detection tests for IPIs may have reduced our sample of infected individuals.

305 Chronic inflammation can be caused by several factors that were not assessed in the present study. However, CRP  
306 and hsCRP levels were measured in individuals residing in the same urban or rural city, with comparable living

307 conditions including housing and type of diet, within each site. Thus they should share comparable levels of  
308 exposure to some NCD risk factors. Moreover, the analysis performed here are comparable to those in other reports  
309 regarding the relationship between infectious diseases or agents and our studied inflammation biomarkers [8, 34].  
310 It is important to note that there is a paucity of previous reports on this topic, especially in adults who carry the  
311 double burden of asymptomatic IPI and a higher risk of NCD.

312

## 313 **Conclusion**

314 The present study suggests that STH and pathogenic protozoan intestinal carriage contribute to low-grade  
315 inflammation, which is risk factor for NCD, mainly cardiovascular diseases. In rural settlements, permanent  
316 exposure to STH may contribute to the increased prevalence of NCD currently observed in Gabon. Although  
317 additional information is required to fully confirm our findings, an integrated package of care, including water and  
318 sanitation hygiene, as preventive measures against NCD should be emphasized in Gabon.

319

## 320 **Acknowledgments**

321 The authors would like to thank all the workers of the Centre de Recherche biomédicale En pathogènes Infectieux  
322 et Pathologies Associées (CREIPA) and all the technicians of the Unité Mixte de Recherche sur les Agents  
323 Infectieux et leur Pathologie (UMRAIP) for their participation to the volunteers recruitment and the sample  
324 analysis in Libreville and Bitam. We would like to thank also the technicians of the laboratory of the Centre  
325 Hospitalier Régional Paul Moukambi of Koula-Moutou and those of the medical center of Bifolossi at Bitam for  
326 their contribution and support in this work, and all the participants to this study.

327

## 328 **Author contributions**

329 **Conceptualization:** Marielle Karine Bouyou Akotet

330 **Data curation:** Helena Noéline Kono, Mérédith Flore Ada Mengome

331 **Formal analysis:** Helena Noéline Kono, Cyrille Bisseye

332 **Funding acquisition:** Marielle Karine Bouyou Akotet

333 **Investigation:** Helena Noéline Kono, Mérédith Flore Ada Mengome, Bedrich Pongui Ngondza, Roger Hadry Sibi  
334 Matotou, Luccheri Ndong Akomezoghe, Bernadette Ekomi, Bridy Chesly Moutombi Ditombi, Jeanne Vanessa  
335 Lengongo Koumba, Jacques Mari Ndong Ngomo, Noé Patrick M'Bondoukwé  
336 **Methodology:** Marielle Karine Bouyou Akotet  
337 **Project administration:** Marielle Karine Bouyou Akotet  
338 **Resources:** Marielle Karine Bouyou Akotet  
339 **Supervision:** Denise Patricia Mawili-Mboumba, Marielle Karine Bouyou Akotet  
340 **Validation:** Marielle Karine Bouyou Akotet  
341 **Visualization:** Helena Noéline Kono  
342 **Writing-original draft:** Helena Noéline Kono, Cyrille Bisseye, Denise Patricia Mawili-Mboumba  
343 **Writing-review and editing:** Helena Noéline Kono, Marielle Karine Bouyou Akotet  
344

## 345 **References**

- 346 1. Hotez, P.J., L. Savioli, and A. Fenwick, *Neglected tropical diseases of the Middle East and North*  
347 *Africa: review of their prevalence, distribution, and opportunities for control.* PLoS Negl Trop  
348 Dis, 2012. **6**(2): p. e1475.
- 349 2. Hales, C.N. and D.J. Barker, *The thrifty phenotype hypothesis.* Br Med Bull, 2001. **60**: p. 5-20.
- 350 3. DeBoer, M.D., *Obesity, systemic inflammation, and increased risk for cardiovascular disease*  
351 *and diabetes among adolescents: a need for screening tools to target interventions.* Nutrition,  
352 2013. **29**(2): p. 379-86.
- 353 4. Kalk, W.J. and B.I. Joffe, *The metabolic syndrome, insulin resistance, and its surrogates in*  
354 *African and white subjects with type 2 diabetes in South Africa.* Metab Syndr Relat Disord,  
355 2008. **6**(4): p. 247-55.
- 356 5. Gurven, M., et al., *Aging and inflammation in two epidemiological worlds.* J Gerontol A Biol Sci  
357 Med Sci, 2008. **63**(2): p. 196-9.
- 358 6. Libby, P., *Inflammation and cardiovascular disease mechanisms.* Am J Clin Nutr, 2006. **83**(2):  
359 p. 456S-460S.
- 360 7. Wu, Y., et al., *The role of helminths in the development of non-communicable diseases.* Front  
361 Immunol, 2022. **13**: p. 941977.
- 362 8. Lambrecht, N.J., et al., *Associations of bacterial enteropathogens with systemic inflammation,*  
363 *iron deficiency, and anemia in preschool-age children in southern Ghana.* PLoS One, 2022.  
364 **17**(7): p. e0271099.
- 365 9. Bhattacharjee, S., N. Kalbfuss, and C. Prazeres da Costa, *Parasites, microbiota and metabolic*  
366 *disease.* Parasite Immunol, 2017. **39**(5).
- 367 10. Miele, L., et al., *Impact of Gut Microbiota on Obesity, Diabetes, and Cardiovascular Disease*  
368 *Risk.* Curr Cardiol Rep, 2015. **17**(12): p. 120.
- 369 11. Fekete, E., et al., *Giardia spp. and the gut microbiota: dangerous liaisons.* Frontiers in  
370 microbiology, 2021. **11**: p. 618106.
- 371 12. Nourrisson, C., et al., *Blastocystis is associated with decrease of fecal microbiota protective*  
372 *bacteria: comparative analysis between patients with irritable bowel syndrome and control*  
373 *subjects.* PLoS One, 2014. **9**(11): p. e111868.

- 374 13. Ridker, P.M., et al., *Inflammation, aspirin, and the risk of cardiovascular disease in apparently*  
375 *healthy men*. N Engl J Med, 1997. **336**(14): p. 973-9.
- 376 14. Carrero, J.J., et al., *hsCRP Level and the Risk of Death or Recurrent Cardiovascular Events in*  
377 *Patients With Myocardial Infarction: a Healthcare-Based Study*. J Am Heart Assoc, 2019. **8**(11):  
378 p. e012638.
- 379 15. Ridker, P.M., et al., *C-reactive protein and other markers of inflammation in the prediction of*  
380 *cardiovascular disease in women*. N Engl J Med, 2000. **342**(12): p. 836-43.
- 381 16. Ridker, P.M., *High-sensitivity C-reactive protein: potential adjunct for global risk assessment in*  
382 *the primary prevention of cardiovascular disease*. Circulation, 2001. **103**(13): p. 1813-8.
- 383 17. Sellmayer, A., T. Limmert, and U. Hoffmann, *High sensitivity C-reactive protein in*  
384 *cardiovascular risk assessment. CRP mania or useful screening?* Int Angiol, 2003. **22**(1): p. 15-  
385 23.
- 386 18. Mintsá Nguema, R., et al., *Baseline Mapping of Schistosomiasis and Soil Transmitted*  
387 *Helminthiasis in the Northern and Eastern Health Regions of Gabon, Central Africa:*  
388 *Recommendations for Preventive Chemotherapy*. Trop Med Infect Dis, 2018. **3**(4).
- 389 19. M'Bondoukwé, N., et al., *Prevalence of Soil-transmitted Helminths and Intestinal Protozoa in*  
390 *Shanty Towns of Libreville, Gabon*. International Journal of TROPICAL DISEASE & Health, 2016.  
391 **20**: p. 1-9.
- 392 20. Ayo Bivigou, E., et al., *Hypertension: Prevalence and Associated Factors in Gabonese Youth and*  
393 *Adolescents*. Cardiology and Cardiovascular Research, 2022. **6**: p. 32-38.
- 394 21. Moutongo Mouandza, R., et al., *Anaemia in asymptomatic parasite carriers living in urban,*  
395 *rural and peri-urban settings of Gabon*. Trans R Soc Trop Med Hyg, 2020. **114**(8): p. 618-626.
- 396 22. M'Bondoukwe N, P., et al., *Prevalence of and risk factors for malaria, filariasis, and intestinal*  
397 *parasites as single infections or co-infections in different settlements of Gabon, Central Africa*.  
398 Infect Dis Poverty, 2018. **7**(1): p. 6.
- 399 23. Ngougou, E.B., et al., *Prevalence of cardiovascular disease in Gabon: a population study*. Arch  
400 Cardiovasc Dis, 2012. **105**(2): p. 77-83.
- 401 24. Coates, M.M., et al., *Burden of non-communicable diseases from infectious causes in 2017: a*  
402 *modelling study*. Lancet Glob Health, 2020. **8**(12): p. e1489-e1498.
- 403 25. Kraszewska-Głomba, B., Z. Szymańska-Toczek, and L. Szenborn, *Procalcitonin and C-reactive*  
404 *protein-based decision tree model for distinguishing PFAPA flares from acute infections*. Bosn  
405 J Basic Med Sci, 2016. **16**(2): p. 157-61.
- 406 26. González-Fernández, D., et al., *C-reactive protein is differentially modulated by co-existing*  
407 *infections, vitamin deficiencies and maternal factors in pregnant and lactating indigenous*  
408 *Panamanian women*. Infectious Diseases of Poverty, 2017. **6**(1): p. 94.
- 409 27. de Gier, B., et al., *Soil-transmitted helminth infections and intestinal and systemic inflammation*  
410 *in schoolchildren*. Acta Trop, 2018. **182**: p. 124-127.
- 411 28. Wiecek, M., et al., *Iron deficiency and biomarkers of inflammation: a 3-year prospective*  
412 *analysis of the DO-HEALTH trial*. Aging Clinical and Experimental Research, 2022. **34**(3): p. 515-  
413 525.
- 414 29. Pita-Rodríguez, G.M., et al., *Influence of Inflammation on Assessing Iron-Deficiency Anemia in*  
415 *Cuban Preschool Children*. MEDICC review, 2022. **23**: p. 37-45.
- 416 30. Ferrari, T.C.A., et al., *Schistosome-associated pulmonary arterial hypertension: a review*  
417 *emphasizing pathogenesis*. Frontiers in Cardiovascular Medicine, 2021. **8**: p. 724254.
- 418 31. Quihui-Cota, L., et al., *Trichuriasis and low-iron status in schoolchildren from Northwest*  
419 *Mexico*. Eur J Clin Nutr, 2010. **64**(10): p. 1108-15.
- 420 32. Rajamanickam, A., et al., *Impact of helminth infection on metabolic and immune homeostasis*  
421 *in non-diabetic obesity*. Frontiers in Immunology, 2020. **11**: p. 2195.
- 422 33. Syed, S., A. Ali, and C. Duggan, *Environmental enteric dysfunction in children: a review*. Journal  
423 of pediatric gastroenterology and nutrition, 2016. **63**(1): p. 6.
- 424 34. Yu, E.X., et al., *Association between anemia and household water source or sanitation in*  
425 *preschool children: the Biomarkers Reflecting Inflammation and Nutritional Determinants of*



426            *Anemia (BRINDA) project.* The American Journal of Clinical Nutrition, 2020.  
427            **112**(Supplement\_1): p. 488S-497S.  
428
